# Supplementary material for: Morus alba Prevented the Cyclophosphamide Induced Somatic and Germinal Cell Damage in Male Rats by Ameliorating the Antioxidant Enzyme Levels
Source: Molecules. 2021 Feb 26;26(5):1266. doi: 10.3390/molecules26051266 (PMC7956634; doi:10.3390/molecules26051266)
Supplement: Supplementary file 1 [file molecules-26-01266-s001.pdf]

# ***Morus alba* Prevented the Cyclophosphamide Induced Somatic and Germinal Cell Damage in Male Rats by Ameliorating the Antioxidant Enzyme Levels**

**Abhijit Ghosh <sup>1</sup>, Syed Imam Rabbani <sup>1,2,\*</sup>, Syed Mohammed Basheeruddin Asdaq <sup>3,\*</sup>, Yahya Mohzari <sup>4</sup>, Ahmed Alrashed <sup>5</sup>, Hamdan Najib Alajami <sup>6</sup>, Awad Othman Aljohani <sup>6</sup>, Abdullah Ali Al Mushtawi <sup>6</sup>, Majed Sultan Alenazy <sup>6</sup>, Rakan Fahad Alamer <sup>6</sup> and Abdulmajeed Khalid Alanazi <sup>6</sup>**

<sup>1</sup> Department of Pharmacology, Al-Ameen College of Pharmacy, Bangalore-560027, India

<sup>2</sup> Department of Pharmacology and Toxicology, College of Pharmacy, Qassim University, Buraydah 51452, Saudi Arabia

<sup>3</sup> Department of Pharmacy Practice, College of Pharmacy, AlMaarefa University, Dariyah, Riyadh 13713, Saudi Arabia

<sup>4</sup> Clinical pharmacy department, King Saud Medical City, Riyadh 12746, Saudi Arabia

<sup>5</sup> Pharmaceutical services administration, Inpatient Department, main hospital, KFMC, Riyadh 11564, Saudi Arabia

<sup>6</sup> Pharmaceutical Services Administration, King Saud Medical City, Ministry of Health, Riyadh 12746, Saudi Arabia

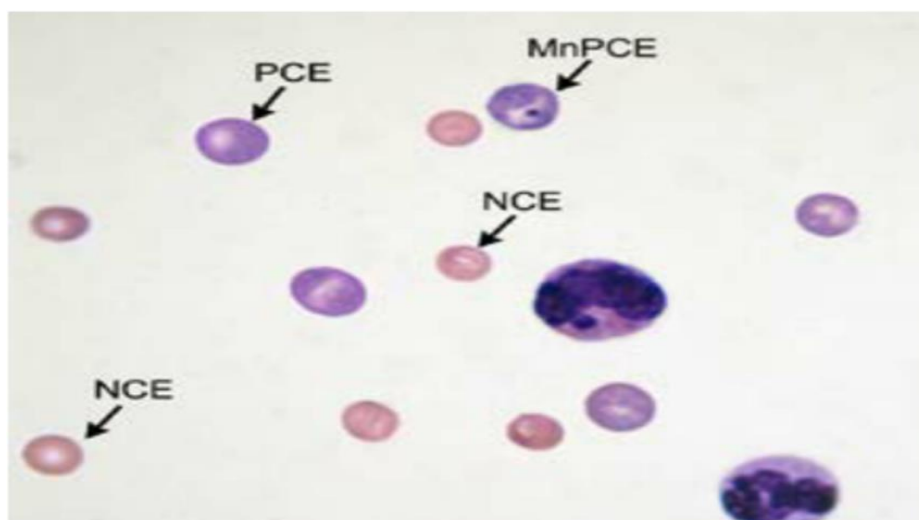

**Figure S1.** Photographs showing the micronuclei in bone marrow erythrocytes.

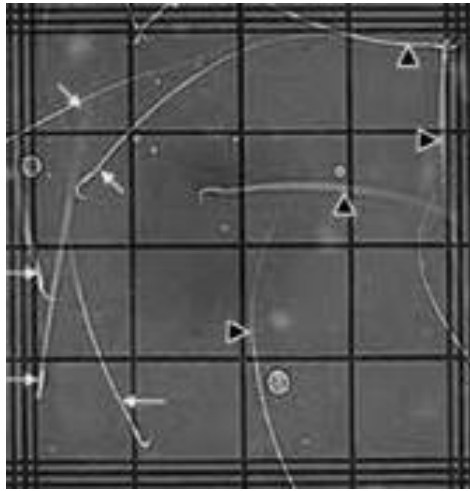

**Figure S2.** Photographs showing the sperm count using Neubauers' chamber.

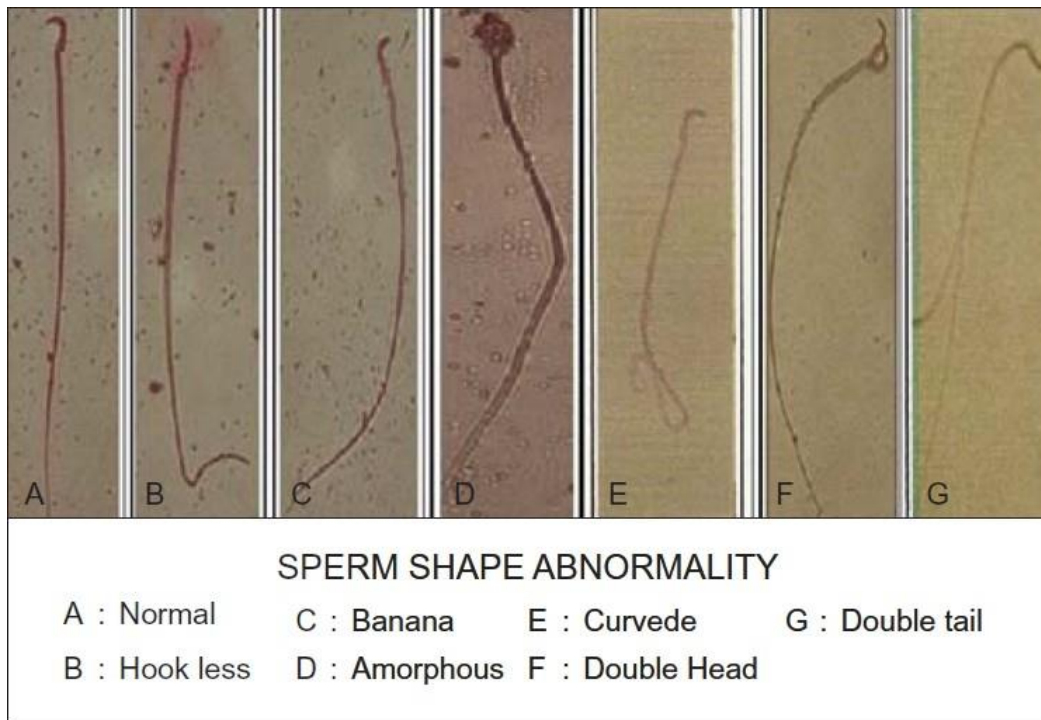

**Figure S3.** Photographs showing the sperm shape abnormalities.

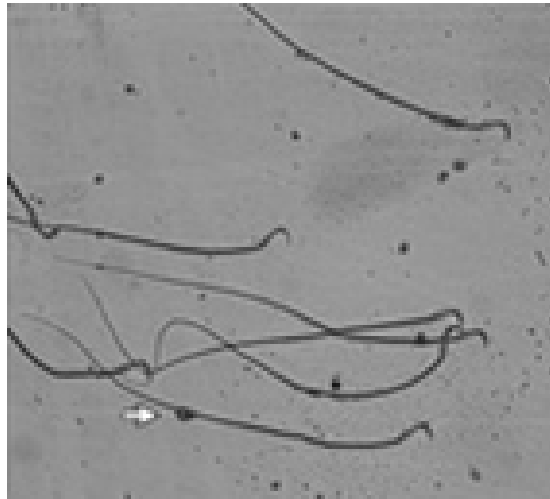

**Figure S4.** Photographs showing the motility of sperms isolated from rats.
